# Supplementary material for: The Mediation Role of Dynamic Multisensory Processing Using Molecular Genetic Data in Dyslexia
Source: MDPI journal article supplement (doi:10.3390/brainsci10120993), 2020-12-16
Supplement: s1 [file s1]

Figure S1. Haploview plot showing pairwise linkage disequilibrium for each gene based on genotypes of unrelated subjects (i.e., probands with DD and typical readers).

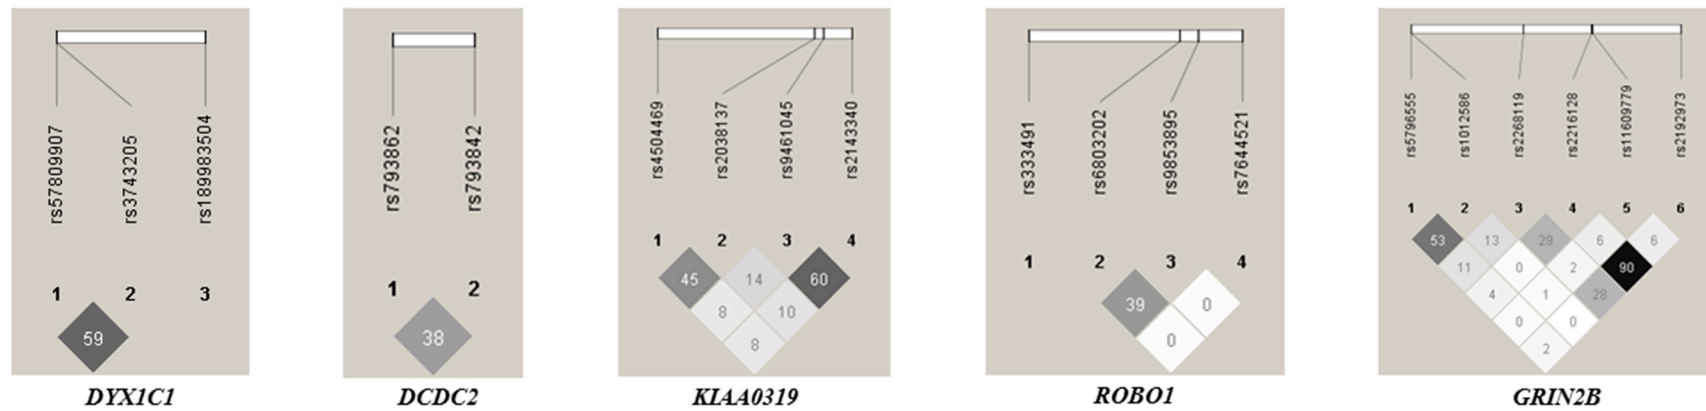

Numbers in squares are  $r^2$  values.

Table S1. Descriptive statistics of the demographic, neuropsychological and cognitive measures.

|                          |     | Total sample (n=302)<br>Age <sup>a</sup> =136.38±33.55;<br>sex <sup>b</sup> =58.9%;<br>SES <sup>c</sup> =59.76±19.61 |               |       | Nuclear families (n=100)                                                                                              |               |          |                                                                                                               |               |                                                                                                                |               |                                                                                                                | General population (n=79) Age <sup>a</sup> =122.25±23.92;<br>sex <sup>b</sup> =50.6%;<br>SES <sup>c</sup> =71.07±15.30 |       |       |                                                                                                                 |         |         |
|--------------------------|-----|----------------------------------------------------------------------------------------------------------------------|---------------|-------|-----------------------------------------------------------------------------------------------------------------------|---------------|----------|---------------------------------------------------------------------------------------------------------------|---------------|----------------------------------------------------------------------------------------------------------------|---------------|----------------------------------------------------------------------------------------------------------------|------------------------------------------------------------------------------------------------------------------------|-------|-------|-----------------------------------------------------------------------------------------------------------------|---------|---------|
|                          |     |                                                                                                                      |               |       | All offspring (n=223)<br>Age <sup>a</sup> =141.41±35.07;<br>sex <sup>b</sup> =61.9%;<br>SES <sup>c</sup> =55.89±19.46 |               |          | Probands<br>(n=99)<br>Age <sup>a</sup> =132.19±28.09 sex <sup>b</sup> =67.7%<br>SES <sup>c</sup> =55.20±19.37 |               | Siblings<br>(n=124)<br>Age <sup>a</sup> =148.82±38.23 sex <sup>b</sup> =57.3%<br>SES <sup>c</sup> =56.45±19.59 |               | Affected<br>(n=148)<br>Age <sup>a</sup> =135.81±30.42 sex <sup>b</sup> =65.5%<br>SES <sup>c</sup> =54.45±19.06 |                                                                                                                        |       |       | Unaffected<br>(n=75)<br>Age <sup>a</sup> =152.37±40.77 sex <sup>b</sup> =54.7%<br>SES <sup>c</sup> =58.72±20.05 |         |         |
|                          |     |                                                                                                                      |               |       | Mean±SD                                                                                                               | Skew.         | Kurtosis | Mean±SD                                                                                                       | Skew.         | Kurtosis                                                                                                       | Mean±SD       | Mean±SD                                                                                                        |                                                                                                                        |       |       | Mean±SD                                                                                                         | Mean±SD | Mean±SD |
| IQ <sup>d</sup>          | TIQ | 111.14±16.81                                                                                                         | 0.20          | -0.52 | 110.82±17.30                                                                                                          | 0.30          | -0.44    | 111.43±16.28                                                                                                  | 110.32±18.11  | 109.36±16.65                                                                                                   | 113.68±18.29  | 110.09±15.40                                                                                                   | -0.16                                                                                                                  | -0.87 |       |                                                                                                                 |         |         |
|                          | VIQ | 105.57±17.65                                                                                                         | 0.29          | -0.40 | 105.12±17.76                                                                                                          | 0.39          | -0.37    | 104.64±16.73                                                                                                  | 105.49±18.57  | 103.37±17.02                                                                                                   | 108.49±18.77  | 106.83±17.38                                                                                                   | 0.02                                                                                                                   | -0.32 |       |                                                                                                                 |         |         |
|                          | PIQ | 113.89±19.95                                                                                                         | 0.07          | -0.15 | 114.01±20.54                                                                                                          | 0.10          | -0.16    | 115.94±20.51                                                                                                  | 112.53±20.52  | 113.22±20.73                                                                                                   | 115.53±20.21  | 113.56±18.29                                                                                                   | -0.05                                                                                                                  | -0.24 |       |                                                                                                                 |         |         |
| READING <sup>e</sup>     |     | -0.98±1.52                                                                                                           | -1.36         | 3.26  | -1.42±1.52                                                                                                            | -1.20         | 3.28     | -2.34±1.44                                                                                                    | -0.68±1.14    | -2.13±1.34                                                                                                     | 0.00±0.55     | 0.26±0.44                                                                                                      | -0.88                                                                                                                  | 0.88  |       |                                                                                                                 |         |         |
| ATTENTION                |     | WE                                                                                                                   | -15.90±32.97  | -0.06 | -0.10                                                                                                                 | -12.30±33.66  | -0.21    | 0.00                                                                                                          | -9.75±33.67   | -14.39±33.64                                                                                                   | -12.13±33.40  | -12.63±34.37                                                                                                   | -25.93±28.87                                                                                                           | 0.21  | 0.04  |                                                                                                                 |         |         |
| VISUAL MOTION PROCESSING |     | RTLI_b <sup>f</sup>                                                                                                  | 0.12±0.93     | 0.52  | -0.96                                                                                                                 | -0.04±0.84    | 0.58     | -0.84                                                                                                         | -0.20±0.77    | 0.10±0.88                                                                                                      | -0.16±0.80    | 0.21±0.88                                                                                                      | 0.75±1.01                                                                                                              | -0.08 | -1.60 |                                                                                                                 |         |         |
|                          |     | RTLI_t <sup>g</sup>                                                                                                  | 1.71±0.81     | 0.68  | 2.02                                                                                                                  | 1.82±0.82     | 0.67     | 2.20                                                                                                          | 1.80±0.89     | 1.84±0.76                                                                                                      | 1.85±0.87     | 1.75±0.72                                                                                                      | 1.32±0.63                                                                                                              | 0.21  | -0.67 |                                                                                                                 |         |         |
| RAP                      |     |                                                                                                                      | 2.08±0.60     | -0.13 | -1.13                                                                                                                 | 2.00±0.62     | 0.08     | -1.18                                                                                                         | 1.88±0.62     | 2.08±0.62                                                                                                      | 1.90±0.62     | 2.18±0.59                                                                                                      | 2.28±0.50                                                                                                              | -0.61 | -0.35 |                                                                                                                 |         |         |
| RAN                      |     | RAN_rt                                                                                                               | 610.41±107.74 | 0.59  | 0.32                                                                                                                  | 609.29±111.85 | 0.62     | 0.29                                                                                                          | 621.81±103.40 | 599.21±117.69                                                                                                  | 623.26±109.66 | 581.35±111.73                                                                                                  | 613.43±96.40                                                                                                           | 0.48  | 0.34  |                                                                                                                 |         |         |

TIQ=total IQ. VIQ=verbal IQ; PIQ=performance IQ; WE=multisensorial warning effect; RTLI\_b= Rotating-Tilted-Lines Illusion slope; RTLI\_t=Rotating-Tilted-Lines Illusion threshold; RAP=rapid auditory processing; RAN\_rt=rapid automatized naming of colors. reaction time.

<sup>a</sup> Age was expressed in years.

<sup>b</sup> Percentage of males was reported.

<sup>c</sup> SES is defined by parental employment coded according to the Hollingshead nine-point scale (Hollingshead, 1975).

<sup>d</sup> For siblings and general population, TIQ, VIQ and PIQ represent an estimated score obtained from the ‘Vocabulary’ and ‘Block Design’ subtests as described in the text.

<sup>e</sup> It refers to the average among text-, single word and single non-words reading tasks (both accuracy and speed) as described in the text. Measures are in SD units relative to the age-appropriate Italian population norm.

<sup>f</sup> It refers to values after logarithm transformation.

<sup>g</sup> It refers to values after square root transformation.

**Table S2. Correlation among the cognitive EPs, age and reading in the total sample (n=302).**

|                                 |                           | ATTENTION | VISUAL MOTION PROCESSING |                     | <b>RAP</b> | RAN      | READING <sup>°</sup> |
|---------------------------------|---------------------------|-----------|--------------------------|---------------------|------------|----------|----------------------|
|                                 |                           | WE        | RTLI_b <sup>b</sup>      | RTLI_t <sup>c</sup> |            | RAN_rt   |                      |
| <b>AGE<sup>a</sup></b>          |                           | 0.094     | 0.144*                   | -0.062              | 0.321**    | -0.519** | 0.104                |
| <b>ATTENTION</b>                | <b>WE</b>                 |           | -0.138*                  | 0.114               | 0.093      | -0.058   | -0.160**             |
| <b>VISUAL MOTION PROCESSING</b> | <b>RTLI_b<sup>b</sup></b> |           |                          | -0.675**            | 0.176**    | -0.030   | 0.263**              |
|                                 | <b>RTLI_t<sup>c</sup></b> |           |                          |                     | -0.163*    | 0.055    | -0.144*              |
| <b>RAP</b>                      |                           |           |                          |                     |            | -0.258** | 0.329**              |
| <b>RAN</b>                      | <b>RAN_rt</b>             |           |                          |                     |            |          | -0.252**             |

WE=multisensorial warning effect; RTLI\_b= Rotating-Tilted-Lines Illusion slope; RTLI\_t= Rotating-Tilted-Lines Illusion threshold;

RAP=rapid auditory processing; RAN\_rt=rapid automatized naming of colors, reaction time.

<sup>°</sup> It refers to the average among text-, single words and single non-words reading (both accuracy and speed) as described in the text.

<sup>a</sup> Age was expressed in years.

<sup>b</sup> It refers to values after logarithm transformation.

<sup>c</sup> It refers to values after square root transformation.

\* Two-tail  $p \leq 0.05$ ; \*\* two-tail  $p \leq 0.01$ .
